1 **Impact of non-pharmaceutical interventions targeted at the COVID-**  
2 **19 pandemic on influenza cases in the UK Armed Forces**

3

4 George Otieno<sup>ab</sup>, Ngwa Niba Rawlings<sup>ac\*</sup>

5

6 <sup>a</sup>Defence Medical Academy, Defence Medical Services (DMS) Whittington, UK

7 <sup>b</sup>Leeds Beckett University, Leeds LS1 3HE, UK

8 <sup>c</sup>The Collaboration for Research Excellence in Africa (CORE Africa), Douala Cameroon

9

10

11 **Corresponding author's**

12 email: [n.rawlings@coreafrica.org](mailto:n.rawlings@coreafrica.org)

13

14

15

16

17

18

19

20

21

22

23

24

25

26

27

28

**NOTE: This preprint reports new research that has not been certified by peer review and should not be used to guide clinical practice.**

29 **Abstract**

30 **Objectives:** The stringent adherence to non-pharmaceutical interventions (NPIs) such as  
31 lockdowns, social distancing and use of face covering was seen during the COVID-19  
32 pandemic in different settings worldwide including the United Kingdom Armed Forces  
33 (UKAF). This study assessed the impact of non-pharmaceutical interventions targeted at the  
34 COVID-19 pandemic on influenza reported cases in the UKAF.

35 **Methods:** A longitudinal study design was used, and secondary data obtained from the  
36 UKAF Defence Medical Information Capability Programme was analysed retrospectively.  
37 Data on influenza cases pre COVID-19 and during the COVID-19 pandemic were compared.  
38 The data was entered into IBM SPSS version 27 and analysis included both descriptive and  
39 inferential statistics with a statistically significant  $p$ -value of  $<0.05$ .

40 **Results:** The influenza seasons pre COVID-19 pandemic (2017-18, 2018-19 and 2019-20 –  
41  $N = 8$  for each season) were associated with larger number of flu cases,  $M = 526.00$  ( $SD =$   
42  $343.860$ ),  $M = 393.25$  ( $SD = 248.529$ ) and  $M = 563.50$  ( $SD = 309.591$ ) respectively. By  
43 comparison, the influenza season during the COVID-19 pandemic (2020-21 –  $N = 8$ ) was  
44 associated with a numerically smaller number of influenza cases,  $M = 95.38$  ( $SD = 70.561$ ).  
45 An independent samples  $t$ -test was performed to test the hypothesis that influenza cases pre  
46 COVID-19 and during the COVID-19 pandemic were associated with statistically significant  
47 different means. Levene's  $F$  test showed heterogeneity of variance when the influenza cases  
48 were compared. The independent sample  $t$ -test was associated with a statistically significant  
49 effect with a large effect size as shown by the Cohen's  $d$  estimates.

50 **Conclusions:** The results indicate that the total number of Influenza cases reported within  
51 UKAF after the onset of the COVID-19 pandemic was significantly lower than the number of  
52 cases reported in influenza seasons pre COVID-19 pandemic. Further research will be  
53 useful in exploring how individual NPI impacts influenza activity in the UKAF to support the  
54 recommendation of effective NPI combinations.

55

56 **Keywords:** Influenza, COVID-19, non-pharmaceutical interventions, UK Armed Forces.

## 57 1. Introduction

58 Influenza is an acute respiratory infection caused by the influenza virus, with severe  
59 implications among high-risk groups such as children, the elderly, pregnant women, health  
60 workers and those with serious medical conditions [1,2]. Like COVID-19 [3,4], influenza is  
61 predominantly transmitted from person to person through respiratory droplets when people  
62 talk, sneeze or cough [2,5,6]; however, the risk of transmission is increased in places where  
63 people stay near each other for prolonged periods such as schools, hospitals, and military  
64 barracks. It is estimated that there are over 1 billion cases of influenza annually, with an  
65 estimated 3 - 5 million severe cases and 290 - 650 thousand influenza-related respiratory  
66 deaths [7]. According to the Office of National Statistics, the number of deaths from influenza  
67 in England and Wales was 510 in 2020, compared to 1,213 and 1,596 in 2019 and 2018  
68 respectively [8].

69 In the military, influenza virus is one of the few infections able to stop military operations due  
70 to its ability to cause a large population of healthy soldiers to suddenly become ill. During the  
71 1918-19 influenza pandemic, approximately 50,000 British soldiers were hospitalized in a  
72 single week, with an estimated 10,000 deaths [9]. In the course of the COVID-19 pandemic,  
73 influenza activity has remained low as confirmed by multiple national surveillance systems in  
74 various countries [10–18].

75 COVID-19 and influenza (flu) are both respiratory diseases with similar transmission  
76 pathways [19]. Public health interventions including non-pharmaceutical interventions (NPIs)  
77 targeted at the COVID-19 pandemic have been reported to have impacted influenza activity  
78 [10,11,13,20,21]. These NPIs include individual measures (such as hand hygiene,  
79 respiratory hygiene and use of face masks); population-related measures (such as  
80 promoting physical distancing and restricting movement/ gathering of people); and  
81 environmental measures (such as cleaning and ventilation of indoor spaces) [22].

82 In the United Kingdom (UK), NPIs used to control COVID-19 include public health  
83 messaging, social and physical distancing measures, national lockdowns (with most people  
84 working from home), the wearing of face coverings, hand hygiene and travel restrictions [10].  
85 These measures were adopted by the UK Armed Forces (UKAF) in military facilities,  
86 including other NPIs such as capacity restrictions in offices and communal areas, use of  
87 screens to separate workstations in offices, isolation of cases and contacts, use of posters to  
88 educate and remind soldiers about COVID-19 prevention measures, conducting military  
89 training in smaller cohorts/teams and regular cleaning/disinfecting surfaces and high touch  
90 points such as door handles and communal items. Although these measures aim to control  
91 COVID-19 transmission in the UKAF, they could potentially have similar effects on influenza

92 activity. This study aims to assess the impact of NPI targeted at the COVID-19 pandemic on  
93 influenza reported cases in the UKAF.

## 94 **2. Materials and Methods**

### 95 **2.1 Study population and design**

96 The study population was UKAF (Army, Air Force and Navy) personnel either currently  
97 serving or previously served and tested positive for influenza during the study period. A  
98 longitudinal study design was used and involved the retrospective analysis of secondary  
99 data obtained from the UKAF Defence Medical Information Capability Programme (DMICP).

### 100 **2.2 Data collection**

101 Data on influenza cases used for this study covered the entire flu season (September to  
102 April) from 2017 to 2021. It included influenza data pre COVID-19 pandemic (September  
103 2017 – April 2018, September 2018 – April 2019; September 2019 - April 2020) and during  
104 the COVID-19 pandemic (September 2020 – April 2021). Sensitive information such as  
105 name, gender, age, and location were not included in the data provided.

### 106 **2.3 Data management.**

107 The data was checked for validity and entered into Microsoft Excel to facilitate storage and  
108 analysis. The data was uploaded onto IBM SPSS version 27 and analysed.

### 109 **2.4 Data analysis**

110 Data analysis aimed to test the hypothesis that the NPIs used during the COVID-19  
111 pandemic had an impact on seasonal influenza cases within the UKAF. Data analysis  
112 involved both descriptive and inferential statistical computations. Descriptive statistics  
113 included but were not limited to means (M), standard deviations (SD), skewness and  
114 kurtosis. Inferential statistics included *t*-tests, Levene's test and Cohen's *d* estimates. A *p*-  
115 value of < 0.05 was considered statistically. Tables and charts were used to present results  
116 after analysis. significant.

### 117 **2.5 Ethical considerations**

118 This study was guided by the Helsinki Declaration as revised in 2013. Ethical approval was  
119 obtained from Leeds Beckett University in line with its ethics policy and procedures. Further  
120 consent was obtained from the UKAF where secondary data was sourced for the study.

## 121 **3. Results**

122 A chart was produced from the collated data to show the trend of influenza cases in the  
123 UKAF over the study period.

124

125 **Figure 1:** Seasonal trends in influenza cases pre COVID-19 and during the COVID-19  
126 pandemic.

127 The influenza seasons pre COVID-19 pandemic (2017-18, 2018-19 and 2019-20 –  $N = 8$  for  
 128 each season) were associated with larger number of flu cases,  $M = 526.00$  ( $SD = 343.860$ ),  
 129  $M = 393.25$  ( $SD = 248.529$ ) and  $M = 563.50$  ( $SD = 309.591$ ) respectively. By comparison,  
 130 the influenza season during the COVID-19 pandemic (2020-21 –  $N = 8$ ) was associated with  
 131 a numerically smaller number of influenza cases,  $M = 95.38$  ( $SD = 70.561$ ). An independent  
 132 samples  $t$ -test was performed to test the hypothesis that influenza cases pre COVID-19 and  
 133 during the COVID-19 pandemic were associated with statistically significant different means.  
 134 As can be seen in Table 1 and Figure 2, the distributions for influenza cases pre COVID-19  
 135 and during the COVID-19 pandemic were sufficiently normal for the purpose of conducting a  
 136  $t$ -test (skew  $< 2.0$  and kurtosis  $< 9.0$ ; [23]). Additionally, the Levene's  $F$  test showed  
 137 heterogeneity of variance when the influenza cases were compared. The independent  
 138 sample  $t$ -test was associated with a statistically significant effect as seen in Table 2. The  
 139 influenza cases during the COVID-19 pandemic were associated with a significantly lower  
 140 mean than the influenza cases pre COVID-19 pandemic. The Cohen's  $d$  estimates as seen  
 141 in Table 3 showed a large effect based on Cohen's (1992) guidelines [24].

142 **Table 1: Descriptive statistics associated with influenza cases before and during the**  
 143 **COVID-19 pandemic in the UKAF**

|                |         | Influenza cases pre COVID-19 pandemic |                |                | Influenza cases during the COVID-19 pandemic |
|----------------|---------|---------------------------------------|----------------|----------------|----------------------------------------------|
|                |         | 2017-18 season                        | 2018-19 season | 2019-20 season | 2020-21 season                               |
| N (months)     | Valid   | 8                                     | 8              | 8              | 8                                            |
|                | Missing | 0                                     | 0              | 0              | 0                                            |
| Mean           |         | 526.00                                | 393.25         | 563.50         | 95.38                                        |
| Std. Deviation |         | 343.860                               | 248.529        | 309.591        | 70.561                                       |
| Skewness       |         | 0.64117679                            | 1.07218163     | -0.762743      | 0.56644166                                   |
| Kurtosis       |         | -0.7158572                            | 0.38271014     | -0.1770959     | -1.4715946                                   |

144

145

146 **Figure 2:** Distribution of influenza cases showing the median, minimum and maximum  
 147 values

149 **Table 2:** Inferential statistics when influenza cases: compared pre and during the COVID-19 pandemic.

| Influenza cases compared pre COVID-19 and during the COVID-19 pandemic |                             | Levene's test for Equality of Variances |      | t-test for Equality of Means |       |                 |                 |                       |                                           |           |
|------------------------------------------------------------------------|-----------------------------|-----------------------------------------|------|------------------------------|-------|-----------------|-----------------|-----------------------|-------------------------------------------|-----------|
|                                                                        |                             | F                                       | Sig. | t                            | df    | Sig. (2-tailed) | Mean Difference | Std. Error Difference | 95% Confidence Interval of the Difference |           |
|                                                                        |                             |                                         |      |                              |       |                 |                 |                       | Lower                                     | Upper     |
| 2017-18<br>vs<br>2020-21                                               | Equal variances assumed     | 8.575                                   | .011 | 3.470                        | 14    | .004            | 430.62500       | 124.10608             | 164.44393                                 | 696.80607 |
|                                                                        | Equal variances not assumed |                                         |      | 3.470                        | 7.588 | .009            | 430.62500       | 124.10608             | 141.71170                                 | 719.53830 |
| 2018-19<br>vs<br>2020-21                                               | Equal variances assumed     | 5.582                                   | .033 | 3.261                        | 14    | .006            | 297.87500       | 91.34114              | 101.96775                                 | 493.78225 |
|                                                                        | Equal variances not assumed |                                         |      | 3.261                        | 8.121 | .011            | 297.87500       | 91.34114              | 87.78793                                  | 507.96207 |
| 2019-21<br>vs<br>2020-21                                               | Equal variances assumed     | 8.971                                   | .010 | 4.170                        | 14    | .001            | 468.12500       | 112.26371             | 227.34329                                 | 708.90671 |
|                                                                        | Equal variances not assumed |                                         |      | 4.170                        | 7.725 | .003            | 468.12500       | 112.26371             | 207.63324                                 | 728.61676 |

**Table 3:** Independent samples effect sizes using the Cohen's *d* estimates

| Influenza cases compared pre COVID-19 and during the COVID-19 pandemic using Cohen's <i>d</i> | Standardizer <sup>a</sup> | Point Estimate | 95% Confidence Interval |       |
|-----------------------------------------------------------------------------------------------|---------------------------|----------------|-------------------------|-------|
|                                                                                               |                           |                | Lower                   | Upper |
| 2017-18 vs 2020-21                                                                            | 248.21216                 | 1.735          | .545                    | 2.882 |
| 2018-19 vs 2020-21                                                                            | 182.68227                 | 1.631          | .461                    | 2.758 |
| 2019-20 vs 2020-21                                                                            | 224.52742                 | 2.085          | .819                    | 3.305 |

151 a. The denominator used in estimating the effect sizes for Cohen's *d* is the pooled standard deviation.

152

#### 153 4. Discussion

154 This study assessed the impact of NPIs targeted at the COVID-19 pandemic on influenza  
155 reported cases in the UKAF. The seasonal trend in influenza cases in the UKAF as seen in  
156 Figure 1 is very similar to the national influenza trend published by Public Health England  
157 (PHE) [10]. This demonstrates that NPIs targeted at the COVID-19 pandemic has the same  
158 effect on influenza activity both in the UKAF and the entire UK population. Both trends show  
159 a steady decrease in the number of influenza cases from January to April in all influenza  
160 seasons pre COVID-19 pandemic. However, in 2020 after the onset of COVID-19, there was  
161 a rise in the number of influenza cases (675 to 781) from February to March which is  
162 uncommon as seen in previous seasons pre COVID-19. This rise was likely to reflect the  
163 period before the 16 March 2020 when the government announced the implementation of  
164 the first national lockdown in the UK [25].

165 The seasonal trend in influenza cases in the UKAF also shows a steady drop in the number  
166 of influenza cases from March to April pre COVID-19 pandemic (2017-18 and 208-19).  
167 However, after the onset of COVID-19, there was a sharp decline in the number of influenza  
168 cases (from 781 to 29 cases) from the month of March to April 2020. This sudden reduction  
169 in the number of cases is likely to reflect the first national lockdown implemented by the UK  
170 government in March 2020 [26]. These findings were consistent with those of Huang and  
171 colleagues who postulated that the use of stringent NPIs (lockdowns and border controls) in  
172 New Zealand markedly changed human behaviour, resulting in substantial reductions in  
173 contact between influenza-infected individuals and influenza-susceptible individuals [11]. A  
174 study conducted in the United States also had similar findings as influenza virus circulation  
175 declined sharply within 2 weeks of the COVID-19 emergency declaration and widespread  
176 implementation of community mitigation measures [27].

177 According to our findings, influenza cases reported in the UKAF during the COVID-19  
178 pandemic (2020-21) were significantly lower than cases reported pre COVID-19 pandemic  
179 (2017-18, 2018-19 and 2019-20). These finding were consistent with those of a report on the  
180 UK's national surveillance through the Acute Respiratory Infection Watch, showing a total of  
181 40 hospitalised confirmed influenza cases across England from 2020 to 2021, compared to a  
182 total of 4,918 cases from 2019 to 2020, 5,667 cases from 2018 to 2019, and 10,107 cases  
183 from 2017 to 2018 [10]. Our findings were also consistent with those of similar studies and  
184 reports from national surveillance systems in the United States [18], New Zealand [11],  
185 Australia [17], Korea [15,16], Taiwan [14] and China [12,13,21], showing a significant  
186 reduction in influenza activity (transmission, number of cases and burden of disease). A  
187 review conducted by Fricke et al showed similar findings and went on to recommend that  
188 NPIs be more strongly emphasized in influenza prevention strategies [20]. Despite this  
189 similar findings from different studies, the WHO's recommended pandemic influenza  
190 interventions do not lay emphasis on the use of NPIs because it considers them to be  
191 ineffective and impractical [28]. Results from this study and other compelling evidence from  
192 similar studies in different settings demonstrate that NPIs (with stringent implementation) can  
193 have a significant positive impact on influenza activity.

194 Although this study adds to existing evidence confirming that NPIs implemented in different  
195 settings aimed at the COVID-19 pandemic has a parallel effect on influenza activity, it is  
196 novel in that it looked at a military population and is probably the first of its kind in such a  
197 setting. Nevertheless, our study had some limitations; firstly, the study did not demonstrate  
198 causality, although the consistency of our findings with multiple studies from different  
199 settings is compelling. This study would have been stronger if it critically analysed the impact  
200 of each NPI on Influenza reported cases. This information would be useful in determining  
201 which combination of NPIs is suitable for application within UKAF. Further studies could look  
202 at the impact of individual NPIs and assess suitable NPI combinations with the most effect in  
203 reducing influenza activity.

## 204 **5. Conclusions**

205 This study assessed the impact of NPI targeted at the COVID-19 pandemic on Influenza  
206 cases within UKAF. The results indicate that the total number of Influenza cases reported  
207 within UKAF after the onset of the COVID-19 pandemic was significantly lower than the  
208 number of cases reported in influenza seasons pre COVID-19 pandemic. Further research  
209 will be useful in exploring how individual NPIs impact influenza activity in the UKAF to  
210 support the recommendation of effective NPI combinations.

211



## 212 Acknowledgements

213 We would like to acknowledge UKAF, the Defence College of Health Education/Training and  
214 Leeds Beckett University for facilitating this study.

## 215 Financial Disclosure statement

216 The author(s) received no specific funding for this work.

217

## 218 References

- 219 1. ICU-HDU Influenza Surveillance: RETIRED [Internet]. NHS Digital. [cited 2022 Jun 6]. Available  
220 from: [https://digital.nhs.uk/data-and-information/data-collections-and-data-sets/data-](https://digital.nhs.uk/data-and-information/data-collections-and-data-sets/data-collections/icu-hdu-influenza-surveillance)  
221 [collections/icu-hdu-influenza-surveillance](https://digital.nhs.uk/data-and-information/data-collections-and-data-sets/data-collections/icu-hdu-influenza-surveillance)
- 222 2. Influenza (Seasonal) [Internet]. [cited 2022 Jun 6]. Available from: [https://www.who.int/news-](https://www.who.int/news-room/fact-sheets/detail/influenza-(seasonal))  
223 [room/fact-sheets/detail/influenza-\(seasonal\)](https://www.who.int/news-room/fact-sheets/detail/influenza-(seasonal))
- 224 3. Wölfel R, Corman VM, Guggemos W, Seilmaier M, Zange S, Müller MA, Niemeyer D, Jones TC,  
225 Vollmar P, Rothe C, Hoelscher M, Bleicker T, Brünink S, Schneider J, Ehmann R, Zwirgmaier K,  
226 Drosten C, Wendtner C. Virological assessment of hospitalized patients with COVID-2019.  
227 *Nature*. 2020 May;581(7809):465–9.
- 228 4. Modes of transmission of virus causing COVID-19: implications for IPC precaution  
229 recommendations [Internet]. Ventures Africa. [cited 2022 Jun 8]. Available from:  
230 [https://venturesafrica.com/apostories/modes-of-transmission-of-virus-causing-covid-19-](https://venturesafrica.com/apostories/modes-of-transmission-of-virus-causing-covid-19-implications-for-ipc-precaution-recommendations/)  
231 [implications-for-ipc-precaution-recommendations/](https://venturesafrica.com/apostories/modes-of-transmission-of-virus-causing-covid-19-implications-for-ipc-precaution-recommendations/)
- 232 5. CDC. How Flu Spreads [Internet]. Centers for Disease Control and Prevention. 2018 [cited 2022  
233 Jun 6]. Available from: <https://www.cdc.gov/flu/about/disease/spread.htm>
- 234 6. Lei H, Li Y, Xiao S, Lin CH, Norris SL, Wei D, Hu Z, Ji S. Routes of transmission of influenza A  
235 H1N1, SARS CoV, and norovirus in air cabin: Comparative analyses. *Indoor Air*. 2018;28(3):394–  
236 403.
- 237 7. Iuliano AD, Roguski KM, Chang HH, Muscatello DJ, Palekar R, Tempia S, Cohen C, Gran JM,  
238 Schanzer D, Cowling BJ, Wu P, Kyncl J, Ang LW, Park M, Redlberger-Fritz M, Yu H, Espenhain L,  
239 Krishnan A, Emukule G, van Asten L, Pereira da Silva S, Aungkulanon S, Buchholz U, Widdowson  
240 MA, Bresee JS, Azziz-Baumgartner E, Cheng PY, Dawood F, Foppa I, Olsen S, Haber M, Jeffers C,  
241 MacIntyre CR, Newall AT, Wood JG, Kundi M, Popow-Kraupp T, Ahmed M, Rahman M, Marinho  
242 F, Sotomayor Proschle CV, Vergara Mallegas N, Luzhao F, Sa L, Barbosa-Ramírez J, Sanchez DM,  
243 Gomez LA, Vargas XB, Acosta Herrera Betsy, Llanés MJ, Fischer TK, Krause TG, Mølbak K,  
244 Nielsen J, Trebbien R, Bruno A, Ojeda J, Ramos H, an der Heiden M, del Carmen Castillo Signor  
245 L, Serrano CE, Bhardwaj R, Chadha M, Narayan V, Kosen S, Bromberg M, Glatman-Freedman A,  
246 Kaufman Z, Arima Y, Oishi K, Chaves S, Nyawanda B, Al-Jarallah RA, Kuri-Morales PA, Matus CR,  
247 Corona MEJ, Burmaa A, Darmaa O, Obtel M, Cherkaoui I, van den Wijngaard CC, van der Hoek  
248 W, Baker M, Bandaranayake D, Bissielo A, Huang S, Lopez L, Newbern C, Flem E, Grøneng GM,

- 249 Hauge S, de Cosío FG, de Moltó Y, Castillo LM, Cabello MA, von Horoch M, Medina Osis J,  
250 Machado A, Nunes B, Rodrigues AP, Rodrigues E, Calomfirescu C, Lupulescu E, Popescu R,  
251 Popovici O, Bogdanovic D, Kostic M, Lazarevic K, Milosevic Z, Tiodorovic B, Chen M, Cutter J,  
252 Lee V, Lin R, Ma S, Cohen AL, Treurnicht F, Kim WJ, Delgado-Sanz C, de mateo Ontañón S,  
253 Larrauri A, León IL, Vallejo F, Born R, Junker C, Koch D, Chuang JH, Huang WT, Kuo HW, Tsai YC,  
254 Bundhamcharoen K, Chittaganpitch M, Green HK, Pebody R, Goñi N, Chiparelli H, Brammer L,  
255 Mustaquim D. Estimates of global seasonal influenza-associated respiratory mortality: a  
256 modelling study. *The Lancet*. 2018 Mar 31;391(10127):1285–300.
- 257 8. Nomis - Official Labour Market Statistics - Nomis - Official Labour Market Statistics [Internet].  
258 [cited 2022 Jun 8]. Available from:  
259 <https://www.nomisweb.co.uk/query/construct/submit.asp?forward=yes&menuopt=201&subcomp=>  
260 [omp=](https://www.nomisweb.co.uk/query/construct/submit.asp?forward=yes&menuopt=201&subcomp=)
- 261 9. The ability of seasonal and pandemic influenza to disrupt military operations [Internet]. JMVH.  
262 [cited 2022 Jun 6]. Available from: [https://jmvh.org/article/the-ability-of-seasonal-and-](https://jmvh.org/article/the-ability-of-seasonal-and-pandemic-influenza-to-disrupt-military-operations/)  
263 [pandemic-influenza-to-disrupt-military-operations/](https://jmvh.org/article/the-ability-of-seasonal-and-pandemic-influenza-to-disrupt-military-operations/)
- 264 10. Surveillance of influenza and other seasonal respiratory viruses in the UK. Winter 2020 to 2021.  
265 2020;51.
- 266 11. Huang QS, Wood T, Jelley L, Jennings T, Jefferies S, Daniells K, Nesdale A, Dowell T, Turner N,  
267 Campbell-Stokes P, Balm M, Dobinson HC, Grant CC, James S, Aminisani N, Ralston J, Gunn W,  
268 Bocacao J, Danielewicz J, Moncrieff T, McNeill A, Lopez L, Waite B, Kiedrzyński T, Schrader H,  
269 Gray R, Cook K, Currin D, Engelbrecht C, Tapurau W, Emmerton L, Martin M, Baker MG, Taylor  
270 S, Trenholme A, Wong C, Lawrence S, McArthur C, Stanley A, Roberts S, Rahnama F, Bennett J,  
271 Mansell C, Dilcher M, Werno A, Grant J, van der Linden A, Youngblood B, Thomas PG, Webby  
272 RJ. Impact of the COVID-19 nonpharmaceutical interventions on influenza and other  
273 respiratory viral infections in New Zealand. *Nat Commun*. 2021 Feb 12;12(1):1001.
- 274 12. Sun J, Shi Z, Xu H. Non-pharmaceutical interventions used for COVID-19 had a major impact on  
275 reducing influenza in China in 2020. *J Travel Med*. 2020 Dec 1;27(8):taaa064.
- 276 13. Cowling BJ, Ali ST, Ng TWY, Tsang TK, Li JCM, Fong MW, Liao Q, Kwan MY, Lee SL, Chiu SS, Wu  
277 JT, Wu P, Leung GM. Impact assessment of non-pharmaceutical interventions against  
278 coronavirus disease 2019 and influenza in Hong Kong: an observational study. *Lancet Public  
279 Health*. 2020 May 1;5(5):e279–88.
- 280 14. Chiu NC, Chi H, Tai YL, Peng CC, Tseng CY, Chen CC, Tan BF, Lin CY. Impact of Wearing Masks,  
281 Hand Hygiene, and Social Distancing on Influenza, Enterovirus, and All-Cause Pneumonia  
282 During the Coronavirus Pandemic: Retrospective National Epidemiological Surveillance Study. *J  
283 Med Internet Res*. 2020 Aug 20;22(8):e21257.
- 284 15. Lee H, Lee H, Song KH, Kim ES, Park JS, Jung J, Ahn S, Jeong EK, Park H, Kim HB. Impact of Public  
285 Health Interventions on Seasonal Influenza Activity During the COVID-19 Outbreak in Korea.  
286 *Clin Infect Dis*. 2021 Jul 1;73(1):e132–40.
- 287 16. Choe YJ, Lee JK. The Impact of Social Distancing on the Transmission of Influenza Virus, South  
288 Korea, 2020. *Osong Public Health Res Perspect*. 2020 Jun;11(3):91–2.
- 289 17. Yeoh DK, Foley DA, Minney-Smith CA, Martin AC, Mace AO, Sikazwe CT, Le H, Levy A, Blyth CC,  
290 Moore HC. Impact of Coronavirus Disease 2019 Public Health Measures on Detections of

- 291 Influenza and Respiratory Syncytial Virus in Children During the 2020 Australian Winter. *Clin*  
292 *Infect Dis.* 2021 Jun 15;72(12):2199–202.
- 293 18. Feng L, Zhang T, Wang Q, Xie Y, Peng Z, Zheng J, Qin Y, Zhang M, Lai S, Wang D, Feng Z, Li Z,  
294 Gao GF. Impact of COVID-19 outbreaks and interventions on influenza in China and the United  
295 States. *Nat Commun.* 2021 May 31;12(1):3249.
- 296 19. CDC. Similarities and Differences between Flu and COVID-19 [Internet]. Centers for Disease  
297 Control and Prevention. 2022 [cited 2022 Jun 6]. Available from:  
298 <https://www.cdc.gov/flu/symptoms/flu-vs-covid19.htm>
- 299 20. Fricke LM, Glöckner S, Dreier M, Lange B. Impact of non-pharmaceutical interventions targeted  
300 at COVID-19 pandemic on influenza burden – a systematic review. *J Infect.* 2021 Jan 1;82(1):1–  
301 35.
- 302 21. Lei H, Xu M, Wang X, Xie Y, Du X, Chen T, Yang L, Wang D, Shu Y. Nonpharmaceutical  
303 Interventions Used to Control COVID-19 Reduced Seasonal Influenza Transmission in China. *J*  
304 *Infect Dis.* 2020 Nov 9;222(11):1780–3.
- 305 22. Guidelines for the implementation of non-pharmaceutical interventions against COVID-19.  
306 *Tech Rep.* :38.
- 307 23. Schmider E, Ziegler M, Danay E, Beyer L, Bühner M. Is It Really Robust? *Methodology.* 2010  
308 *Jan*;6(4):147–51.
- 309 24. Cohen J. A power primer. *Psychol Bull.* 1992;112(1):155–9.
- 310 25. Prime Minister’s statement on coronavirus (COVID-19): 16 March 2020 [Internet]. GOV.UK.  
311 [cited 2022 Jun 9]. Available from: [https://www.gov.uk/government/speeches/pm-statement-](https://www.gov.uk/government/speeches/pm-statement-on-coronavirus-16-march-2020)  
312 [on-coronavirus-16-march-2020](https://www.gov.uk/government/speeches/pm-statement-on-coronavirus-16-march-2020)
- 313 26. Prime Minister’s statement on coronavirus (COVID-19): 23 March 2020 [Internet]. GOV.UK.  
314 [cited 2022 Jun 9]. Available from: [https://www.gov.uk/government/speeches/pm-address-to-](https://www.gov.uk/government/speeches/pm-address-to-the-nation-on-coronavirus-23-march-2020)  
315 [the-nation-on-coronavirus-23-march-2020](https://www.gov.uk/government/speeches/pm-address-to-the-nation-on-coronavirus-23-march-2020)
- 316 27. Lasry A, Kidder D, Hast M, Poovey J, Sunshine G, Winglee K, Zviedrite N, Ahmed F, Ethier KA,  
317 Clodfelter C, Howard-Williams M, Hulkower R, Jeong G, Landsman L, McCord R, Moreland A,  
318 Shelburne J, Billioux A, Hand J, Kanter J, Smith A, Sokol T, Duchin JS, Fagalde MS, Pogojans S,  
319 Brown R, Huang S, Moss N, Pan E, Shemsu M, Yette E, Bock C, Curtis-Robles R, Lockett C,  
320 Morrow S, Sallenave C, Santora L, Willis M. Timing of Community Mitigation and Changes in  
321 Reported COVID-19 and Community Mobility — Four U.S. Metropolitan Areas, February 26–  
322 April 1, 2020. *Morb Mortal Wkly Rep.* 2020 Apr 17;69(15):451–7.
- 323 28. Nonpharmaceutical Interventions for Pandemic Influenza, National and Community Measures -  
324 Volume 12, Number 1—January 2006 - *Emerging Infectious Diseases journal* - CDC. [cited 2022  
325 Jun 9]; Available from: [https://wwwnc.cdc.gov/eid/article/12/1/05-1371\\_article](https://wwwnc.cdc.gov/eid/article/12/1/05-1371_article)

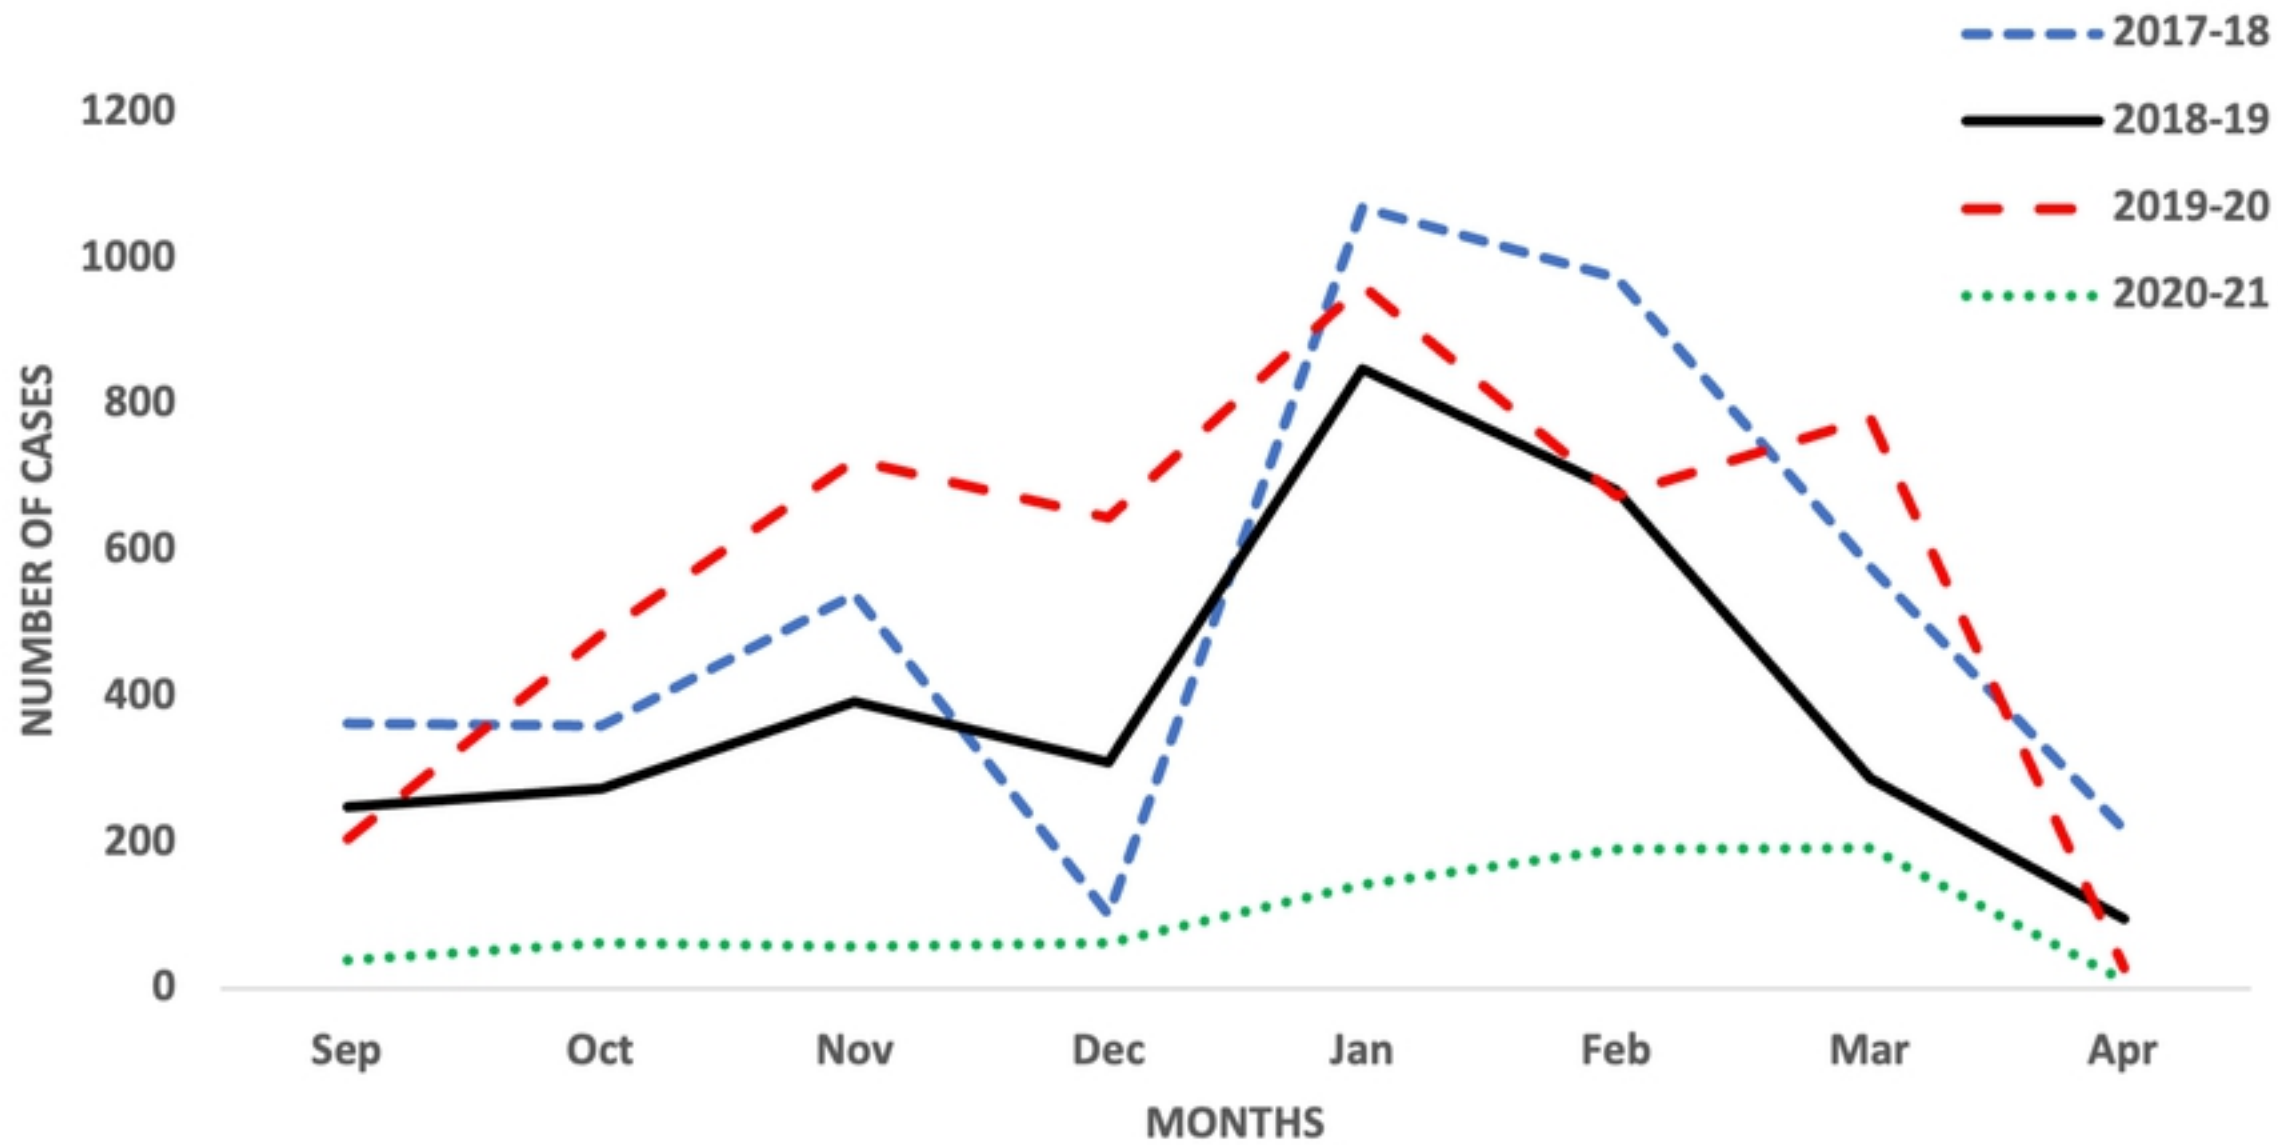

Fig 1

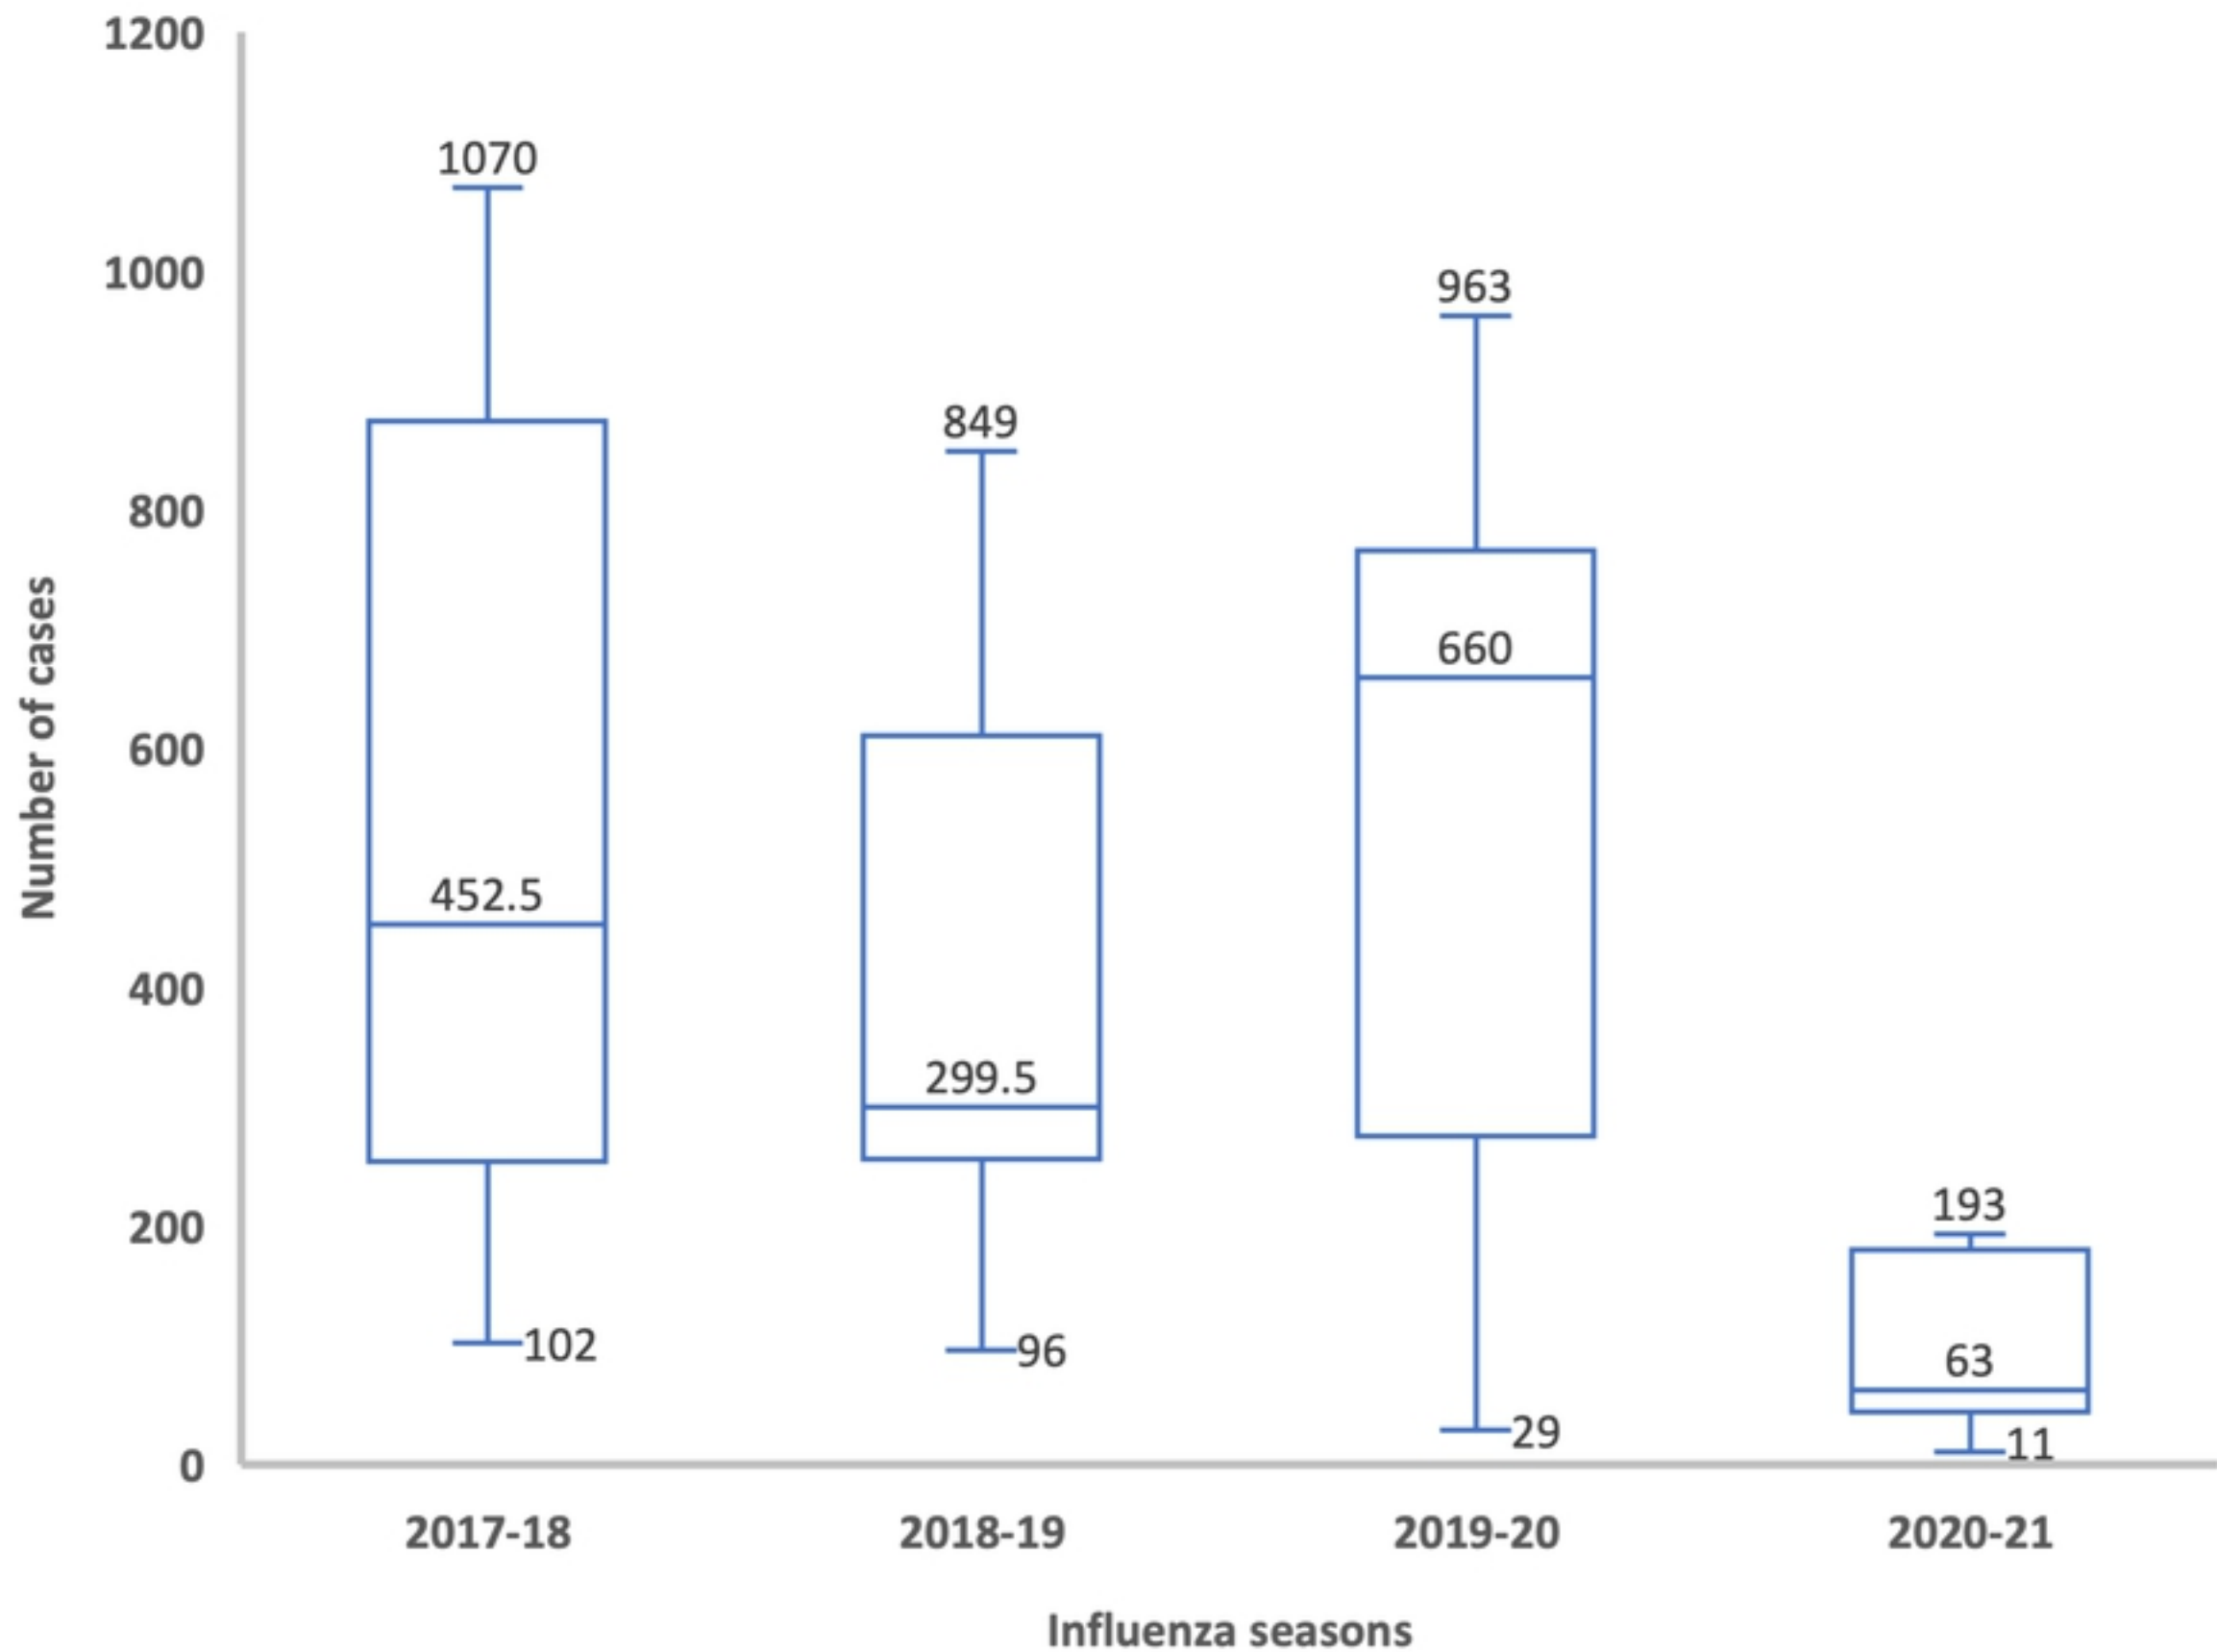

Fig 2
